# Supplementary material for: Process Optimization of Scaled-Up Production and Biosafety Evaluation of the Dimethyl-Dioctadecyl-Ammonium Bromide/Poly(lactic acid) Nano-Vaccine
Source: MDPI journal article supplement (doi:10.3390/jfb15050127), 2024-05-14
Supplement: s1 [file s1]

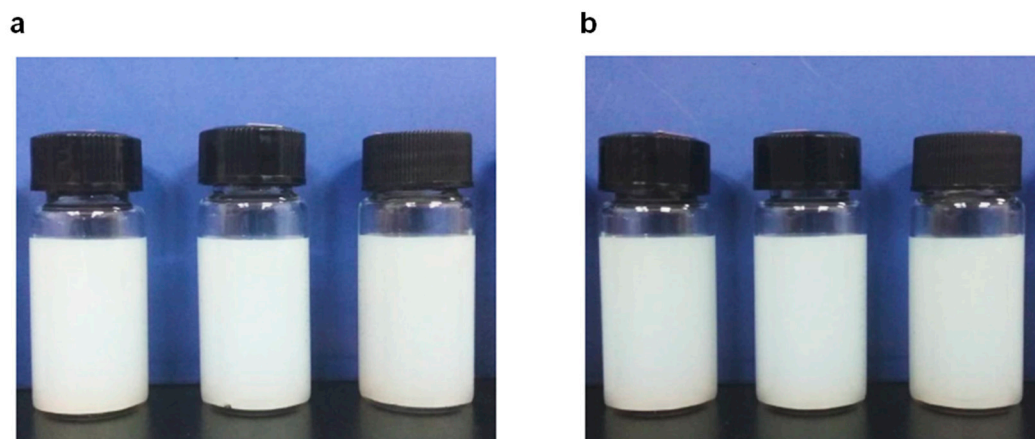

**Figure S1.** Pictures of DDAB/PLA NPs stored for 30 d. (a) Storage at room temperature and (b) Storage at 4°C.

**Table S1** Peak areas of the reference solution and DDAB/PLA NPs by the GC method.

| Group              | Solvent type | Peak area |        |        |        |        |        |
|--------------------|--------------|-----------|--------|--------|--------|--------|--------|
| Reference solution | Ethanol      | 4.12      | 3.96   | 3.89   | 4.08   | 3.83   | 3.86   |
|                    | Acetone      | 12.81     | 12.74  | 13.36  | 12.95  | 13.08  | 13.22  |
| NPs solution       | Ethanol      | 87.67     | 89.54  | 91.59  | 87.09  | 89.32  | 93.36  |
|                    | Acetone      | 304.19    | 314.86 | 315.69 | 314.23 | 314.02 | 316.71 |

**Table S2** Main organ weight of each group of mice in repeated toxicity study.

| Group     | Organ weight / g |           |           |           |           |
|-----------|------------------|-----------|-----------|-----------|-----------|
|           | Heart            | Liver     | Spleen    | Lung      | Kidney    |
| Control   | 0.13±0.03        | 1.31±0.22 | 0.13±0.03 | 0.17±0.02 | 0.29±0.04 |
| NPs×1-Ag  | 0.11±0.02        | 1.04±0.08 | 0.12±0.01 | 0.15±0.01 | 0.27±0.02 |
| NPs×10-Ag | 0.10±0.02        | 0.93±0.01 | 0.1±0.01  | 0.14±0.02 | 0.25±0.01 |

|            |           |           |          |           |           |
|------------|-----------|-----------|----------|-----------|-----------|
| NPs×50-Ag  | 0.12±0.01 | 1.05±0.07 | 0.1±0.03 | 0.14±0.01 | 0.28±0.01 |
| NPs×100-Ag | 0.12±0.01 | 1.05±0.11 | 0.1±0.01 | 0.42±0.45 | 0.29±0.02 |

**Table S3** Major organ coefficient of each group of mice in repeated toxicity study.

| Group      | Organ weight/g |            |           |           |            |
|------------|----------------|------------|-----------|-----------|------------|
|            | Heart          | Liver      | Spleen    | Lung      | Kidney     |
| Control    | 4.39±0.85      | 43.24±7.38 | 4.41±1.13 | 5.54±0.81 | 9.66±1.16  |
| NPs×1-Ag   | 5.69±1.11      | 45.98±6.23 | 5.5±1.21  | 7.53±0.74 | 13.31±0.6  |
| NPs×10-Ag  | 4.58±0.92      | 44.47±0.57 | 4.6±0.43  | 6.91±0.75 | 11.73±0.35 |
| NPs×50-Ag  | 5.54±0.65      | 49.86±3.31 | 4.74±1.3  | 6.62±0.61 | 13.44±0.46 |
| NPs×100-Ag | 5.83±0.38      | 50.13±5.14 | 4.92±0.1  | 7.37±1.94 | 14.04±1.04 |

**Table S4** Mouse rectal temperature.

| Group      | 0 d        |            | 14 d       |            | 28 d       |            |
|------------|------------|------------|------------|------------|------------|------------|
|            | t0         | t4         | t0         | t4         | t0         | t4         |
| Control    | 36.80±0.20 | 36.87±0.15 | 36.67±0.23 | 36.80±0.35 | 36.50±0.17 | 36.77±0.21 |
| NPs×1-Ag   | 36.60±0.06 | 36.93±0.45 | 36.67±0.35 | 37.03±0.29 | 36.73±0.32 | 36.83±0.32 |
| NPs×10-Ag  | 36.33±0.10 | 36.70±0.10 | 36.43±0.20 | 36.00±0.40 | 36.60±0.58 | 37.00±0.17 |
| NPs×50-Ag  | 36.50±0.38 | 36.70±0.10 | 36.43±0.21 | 37.20±0.50 | 36.73±0.25 | 37.10±0.20 |
| NPs×100-Ag | 36.83±0.46 | 37.50±0.36 | 36.70±0.10 | 37.50±0.36 | 36.70±0.36 | 37.53±0.15 |
